# Supplementary material for: A Signaling Crosstalk between BMP9 and HGF/c-Met Regulates Mouse Adult Liver Progenitor Cell Survival
Source: MDPI journal article supplement (doi:10.3390/cells9030752), 2020-03-19

## Supplementary information

### Supplementary table S1

Sequence of primers used in Quantitative Reverse Transcriptase-Polymerase Chain Reaction.

| Protein | Gene                | Forward primer (5'-3')  | Reverse primer (5'-3') |
|---------|---------------------|-------------------------|------------------------|
| ID1     | <i>Id1</i>          | GAGTCTGAAGTCGGGACCAC    | AACACATGCCGCCTCGG      |
| ALK1    | <i>Acvr11(Alk1)</i> | AACATCCTAGGCTTCATCGCC   | AGTCATAGAGGGAGCCGTGT   |
| ALK2    | <i>Acvr1(Alk2)</i>  | AGACAGCACTCTAGCGGAAC    | TCCCCGACACACTCCAACAG   |
| BMPR2   | <i>Bmpr2</i>        | GCAGCAGTATACAGATAGGTGA  | CGCCACCGCTTAAGAGAGTAT  |
| ActRIIA | <i>Acvr2a</i>       | GCGAGAACTTCCTACGGCTT    | CCTGAGTTTCTGATCTGCCA   |
| ActRIIB | <i>Acvr2b</i>       | CATTGCTGCCGAGAAACGAG    | GAGGTAATCCGTGAGGGAGC   |
| GUSB    | <i>Gusb</i>         | AAAATGGAGTGCGTGTTGGGTCG | CCACAGTCCGTCCAGCGCCTT  |

### Supplementary table S2

List of antibodies used in Western blot analysis.

| Antibody Target    | Specie        | Dilution | Manufacturer (reference)             |
|--------------------|---------------|----------|--------------------------------------|
| $\beta$ -ACTIN     | Mouse (AC-15) | 1:5000   | Sigma (A5441)                        |
| ID1                | Mouse (B-8)   | 1:500    | Santa Cruz Biotechnology (sc-133104) |
| P38 $\alpha/\beta$ | Mouse (A-12)  | 1:500    | Santa Cruz Biotechnology (sc-7972)   |
| P-P38              | Rabbit        | 1:1000   | Cell Signaling Technology (#9211)    |
| P-SMAD1,5,8        | Rabbit        | 1:1000   | Cell Signaling Technology (#9516)    |
| SMAD1              | Rabbit        | 1:1000   | Cell Signaling Technology (#9743)    |
| $\alpha$ -TUBULIN  | Mouse (TU-02) | 1:5000   | Santa Cruz Biotechnology (sc-8035)   |

### Supplementary figure legends

**Supplementary figure S1. Analysis of ALK2 as the type I receptor mediating BMP9 effects in Met<sup>-/-</sup> oval cells.**

**A.** Met<sup>-/-</sup> oval cells were affinity-labelled with <sup>125</sup>I\_BMP9 and crosslinked ligand-receptor complexes were immunoprecipitated with specific antisera as indicated and subjected to SDS-PAGE and autoradiography. **B-D.** ALK2 knockdown Met<sup>-/-</sup> oval cells were generated by stable infection with lentiviral vectors expressing an ALK2 targeting short hairpin RNA (shALK2; generated using TRCN0000000441) or a non-targeting short hairpin RNA (NT). **B.** *Alk2* mRNA levels were determined by RT-qPCR. Data are expressed relative to NT cells (assigned an arbitrary value of 1) and normalized using *Gusb*. **C.** Transcriptional reporter assay in NT and shALK2 oval cells treated with BMP9 (2ng/ml). Data are mean ± S.D from one representative experiment performed in sextuplicates. **D.** NT and shALK2 oval cells treated with BMP9 (2ng/ml) for 2 days were counted. Data are expressed as percentage relative to NT untreated cells and are mean ± S.E.M from 3 independent experiments performed in triplicate. Data were compared with untreated group or as indicated, \*\*\*=*p*<0.001.

**Supplementary figure S2. Expression of BMP9 receptors in oval cells.**

**A.** Oval cells were treated for 0.5 or 15 hours with HGF (40ng/ml) in 0% FBS medium. *Alk1*, *Alk2*, *Bmpr2*, *Acvr2a* and *Acvr2b* levels were analyzed by RT-qPCR and normalized to *Gusb*. Data are shown as fold change relative to untreated cells and are mean ± S.E.M from 2-3 independent experiments. **B.** Oval cells were treated for 1 hour with BMP9 (2ng/ml) in the absence or presence of HGF (40ng/ml) in 0% FBS medium. *Alk2* levels were analyzed by RT-qPCR and normalized to *Gusb*. Data are shown as fold change relative to untreated cells and are mean ± S.E.M from 2 independent experiments. Data were compared with untreated group or as indicated, \*=*p*<0.05.

**Supplementary figure S3. Effect of knocking down ALK1 on oval cell response.**

ALK1 knockdown oval cells (shALK1#1 and shALK1#2, generated using TRCN0000022540-553 and TRCN0000231254-840, respectively) and their non-targeting control (NT) oval cells were generated by stable infection with lentiviral vectors expressing an ALK1 targeting or a non-targeting short hairpin RNA. **A-B.** *Alk1* mRNA levels were determined by RT-qPCR. Data are expressed relative to NT cells (assigned an arbitrary value of 1) (n=2). **C.** NT and shALK1 stable oval cells were transfected with pGL3(BRE)-luciferase reporter gene, then were serum starved and treated for 15 hours with BMP9 (2ng/ml) in the absence or presence of HGF (40ng/ml). Luciferase activity was normalized to cell number. Data are mean  $\pm$  S.E.M. from 2 experiments run in sextuplicate and are expressed as fold change relative to untreated cells. **C.** NT and shALK1 stable oval cells were treated with BMP9 (2ng/ml) in the absence or presence of HGF (40ng/ml) in 0% FBS medium and counted at day 2. Data are mean  $\pm$  S.E.M from 3 experiments performed in triplicate and are expressed as percentage of NT untreated cells. Data were compared with untreated group or as indicated,  $*=p<0.05$ ;  $***=p<0.001$ .

**Supplementary figure S4. BMP9-triggered p38MAPK activation is abolished in shALK2 oval cells.**

shALK2 and non-targeting control (NT) oval cells (generated as described in supplementary figure 1 legend) were treated for 30 minutes with BMP9 (2 ng/ml) in 0% FBS medium. Western blots for P-P38 and P38 were performed. A representative experiment of 3 is shown.

**Supplementary figure S5. Activation of p38 by BMP9 in oval cells with functional or non-functional Met signaling.**

A. Met<sup>flx/flx</sup> and Met<sup>-/-</sup> oval cells were treated for different periods of time with BMP9 (2ng/ml) in 0% FBS medium. Western blots for P-P38 were performed and  $\beta$ -ACTIN was used as loading control. A representative experiment of 3 performed is shown.

## Supplementary methods

### <sup>125</sup>[I]BMP-9 binding assay

Iodination of BMP-9 was performed according to the chloramine T method and cells were subsequently affinity-labeled with the radioactive ligand as previously described (van Meeteren et al., 2008). In brief, cells were incubated on ice for 2 hours with the radioactive ligand. After incubation, cells were washed and crosslinking was performed using 54 mM disuccinimidyl suberate (DSS) and 3 mM bis(sulfosuccinimidyl)suberate (BS3 Pierce, Bleiswijk, Netherlands) for 15 minutes. Cells were washed, scraped and lysed. Lysates were boiled in sodium dodecyl sulphate (SDS) sample buffer and subjected to SDS-PAGE directly or were incubated with anti-ALK1 and anti-ALK2 antibodies overnight and immune complexes were precipitated by adding protein A Sepharose (GE Healthcare Europe). Samples were washed, boiled in SDS sample buffer and subjected to SDS-PAGE. Gels were dried and scanned with the STORM imaging system (GE Healthcare Europe).

- van Meeteren LA, Thorikay M, Bergqvist S et al. Anti-human activin receptor-like kinase 1 (ALK1) antibody attenuates bone morphogenetic protein 9 (BMP9)-induced ALK1 signaling and interferes with endothelial cell sprouting. *J Biol Chem.* 2012; 287, 18551-18561.

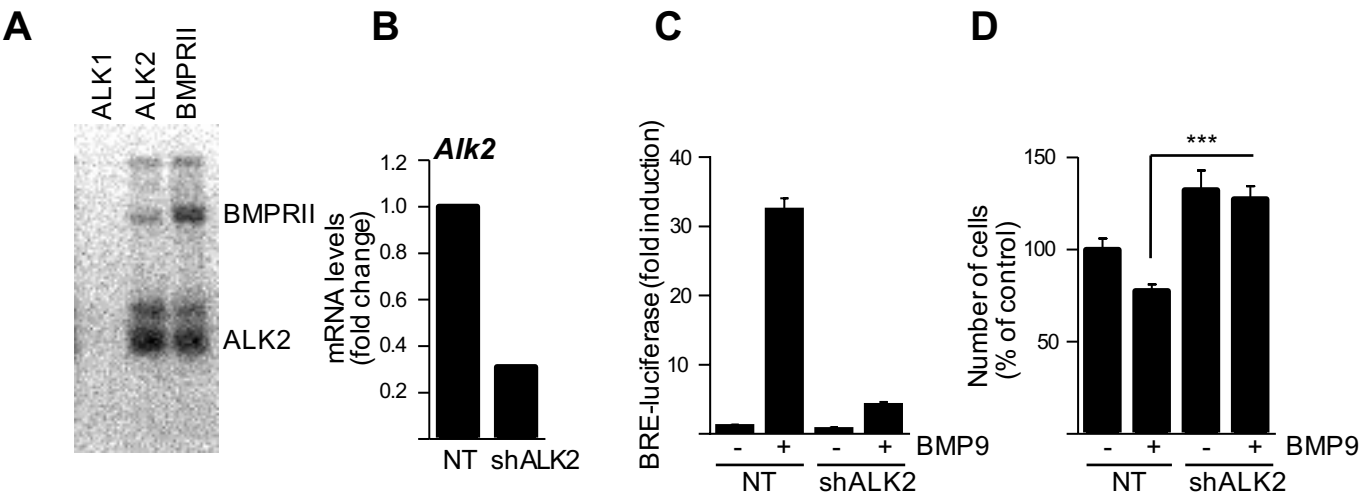

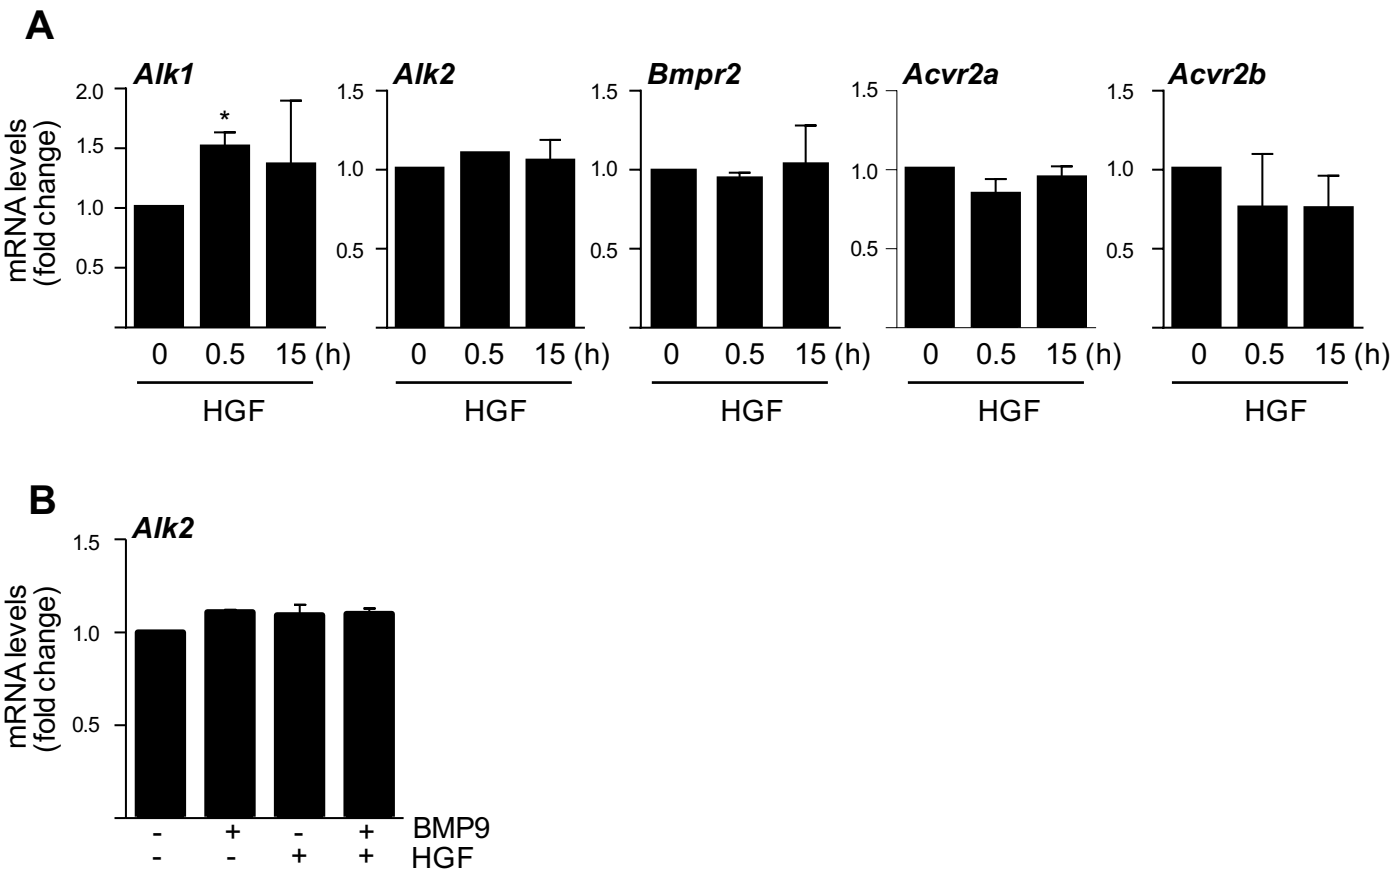

**A**

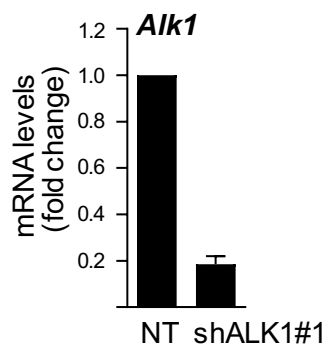

**B**

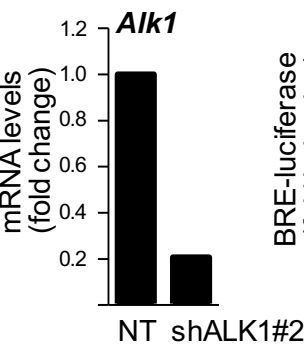

**C**

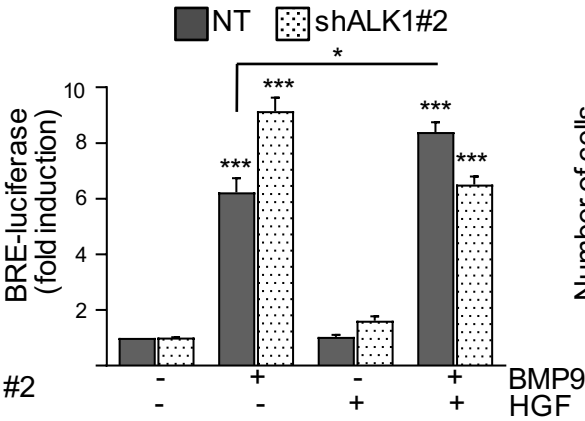

**D**

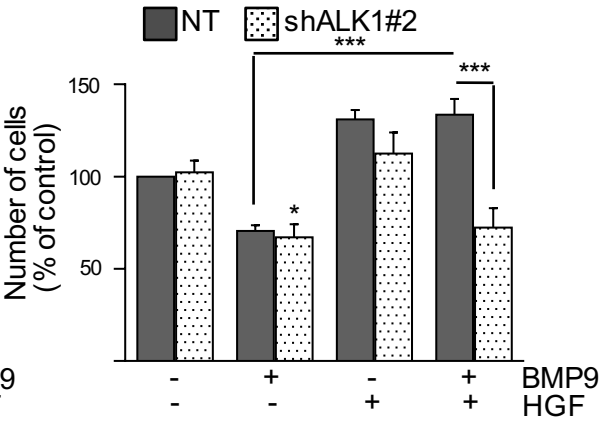

Supplementary Figure 4 Addante et al.

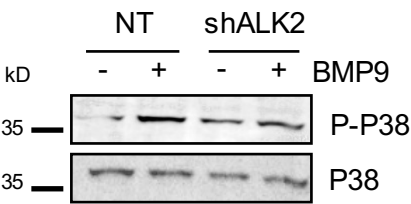



Supplementary Figure 5 Addante et al.

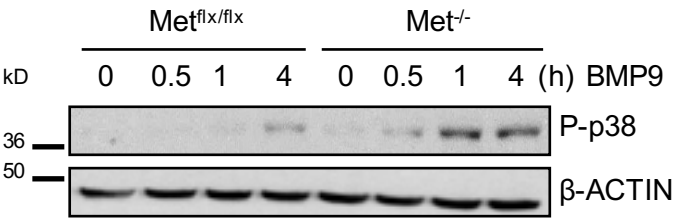

Supplement: s1 [file s1]
